# Supplementary material for: Gause's Principle and the Effect of Resource Partitioning on the Dynamical Coexistence of Replicating Templates
Source: PLoS Comput Biol. 2013 Aug 22;9(8):e1003193. doi: 10.1371/journal.pcbi.1003193 (PMC3749944; doi:10.1371/journal.pcbi.1003193)
Supplement: Table S2 — Analysis of coexistence of non-complementary pairs of length according to method M2. Second column shows the number of scanned sequences (and the amount as a fraction of the combined sequence space). The third column shows the fraction of coexisting sequences averaged over the scanned sequence groups and over 1000 random degradation rate sets for intermediates (for parameters, see previous section of Text S1). (XLS) [file pcbi.1003193.s005.xls]

## Sheet: Sheet1
N	Number of scanned seq.s	Fraction of coexistence (l2)
2	48 (100%)	0.7125
3	48 (0.4%)	0.3441
4	48 (0.0015%)	0.0925
5	48 (6·10-6%)	n/a
